# Supplementary material
Source: PubMed Central journal article supplement (PMC3458168)
Supplement: NIHMS398262-supplement-1.pdf [file NIHMS398262-supplement-1.pdf]

## Supplementary information

# Orchestrated experience-driven *Arc/Arg3.1* responses are disrupted in a mouse model of Alzheimer's disease

Nikita Rudinskiy<sup>1</sup>; Jonathan M. Hawkes<sup>1,2</sup>; Rebecca A. Betensky<sup>3</sup>; Megumi Eguchi<sup>4</sup>; Shun Yamaguchi<sup>4</sup>; Tara L. Spires-Jones<sup>1</sup>; Bradley T. Hyman<sup>1\*</sup>

<sup>1</sup>Alzheimer's Disease Research Laboratory, Department of Neurology, MassGeneral Institute for Neurodegenerative Disease, Massachusetts General Hospital / Harvard Medical School, Charlestown, Massachusetts 02129, USA. <sup>2</sup>Behavioral Neuroscience Program, Northeastern University, Boston, Massachusetts 02115, USA. <sup>3</sup>Department of Biostatistics, Harvard School of Public Health, Boston, Massachusetts 02115, USA. <sup>4</sup>Division of Morphological Neuroscience, Gifu University Graduate School of Medicine, Gifu 501-1194, Japan.

## Contents:

Supplementary Figures 1-4

Supplementary Table 1

\* To whom correspondence should be addressed. E-mail: [bhyman@partners.org](mailto:bhyman@partners.org)

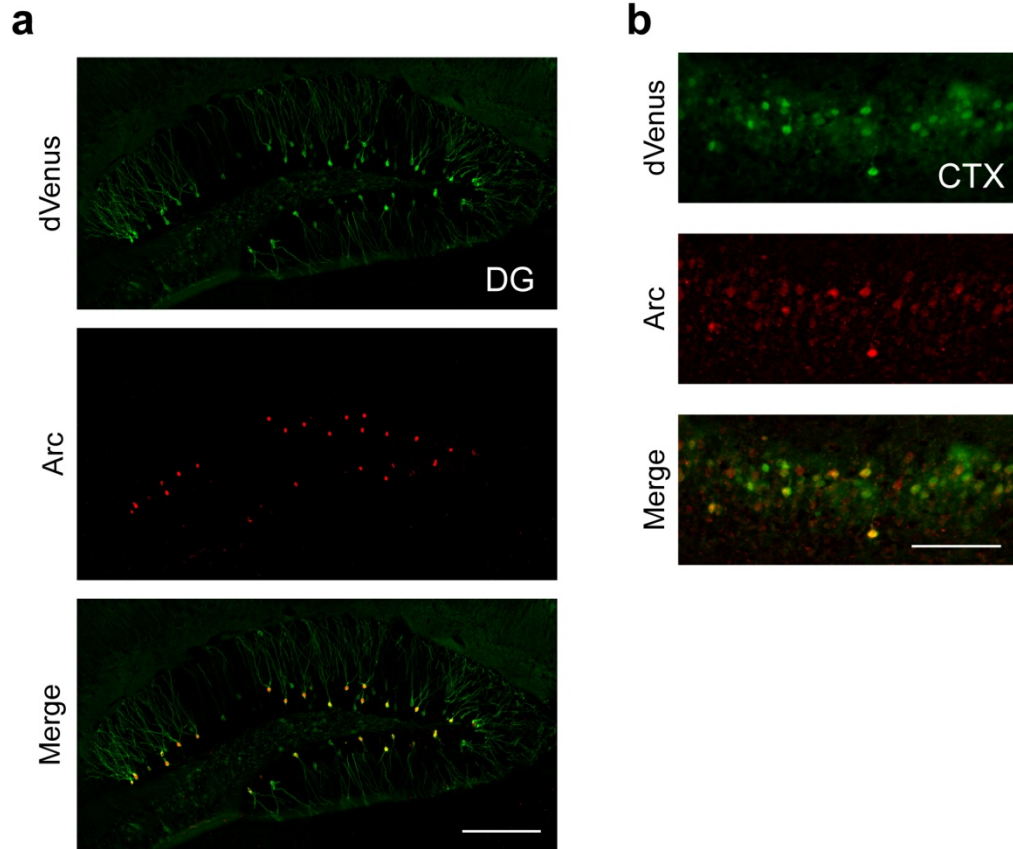

**Supplementary Figure 1.** Arc protein co-localizes with dVenus.

Immunohistochemical staining for Arc and dVenus in different brain regions of *Arc::dVenus* mice sacrificed two hours after the end of visual stimulation. Time point of two hours was chosen as having sufficient levels of both Arc and dVenus proteins (Supplementary Fig. 4, <sup>10</sup>). Green – dVenus, red – Arc. **(a)** Dentate gyrus region of hippocampal formation. Scale bar = 500  $\mu\text{m}$ . **(b)** Neuronal layer II/III of medial extrastriate cortex. Scale bar = 200  $\mu\text{m}$ . Occasional lack of colocalization of Arc::dVenus with endogenous Arc protein is expected due to different dynamics of *Arc::dVenus* and *Arc* mRNA expression in response to a stimulus as reported in <sup>10</sup>.

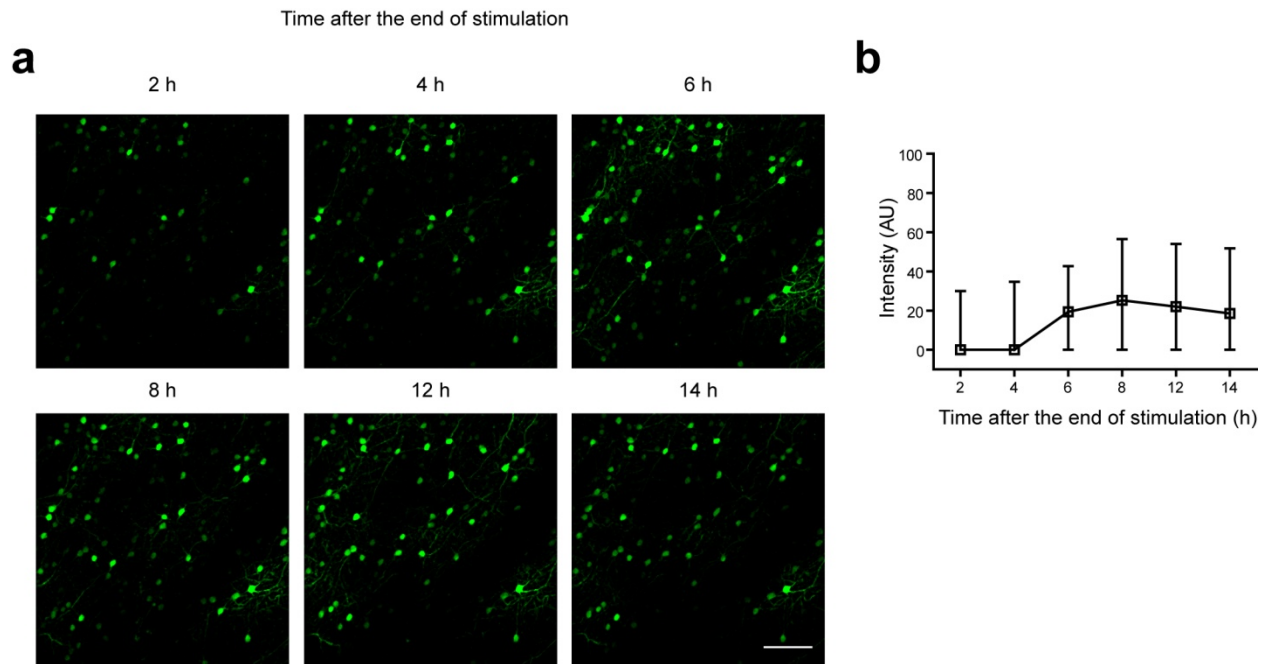

**Supplementary Figure 2.** Time course of Arc::dVenus expression in the visual cortex following 1-hour structured visual stimulation in the cylinder with vertical stripes.

(a) Maximum intensity projections of *in vivo* image stacks of the same region of medial extrastriate visual cortex imaged at several time points after the end of stimulation. Scale bar = 100  $\mu$ m. (b) Dynamics of Arc::dVenus fluorescence intensity in individual neurons over time. Data presented as medians with interquartile ranges. N = 4 mice, 2060 neurons.

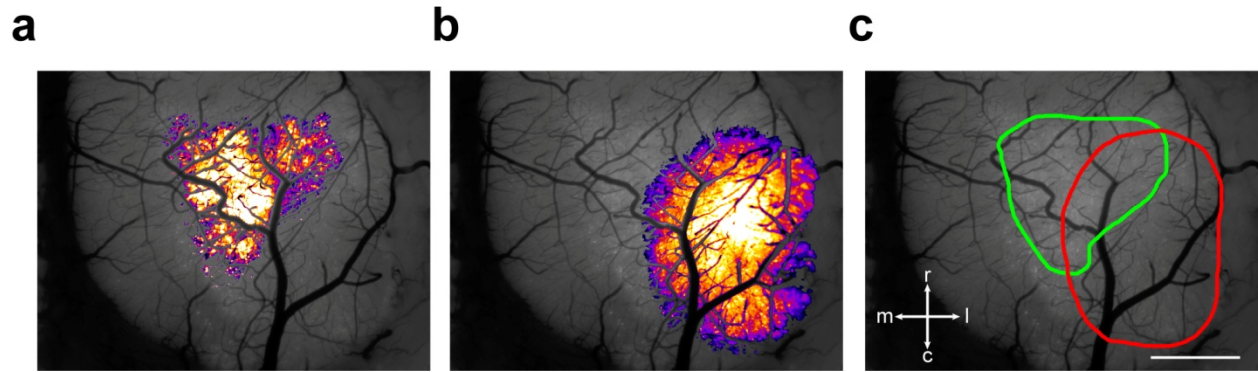

**Supplementary Figure 3.** Low-resolution *in vivo* overview image of Arc::dVenus fluorescence in mouse right visual cortex.

Arc::dVenus fluorescence was imaged 6 hours after standard 1-hour visual stimulation in an illuminated cylinder with vertical stripes (**a**) and after 7 hours of continuous visual stimulation with white light (**b**). In (**a**) Arc::dVenus signal is localized to the medial aspect of visual cortex, while in (**b**) it is concentrated more laterally. (**c**) Superimposed outlines of bright areas from (**b**) and (**c**). Scale bar = 1000  $\mu\text{m}$ .

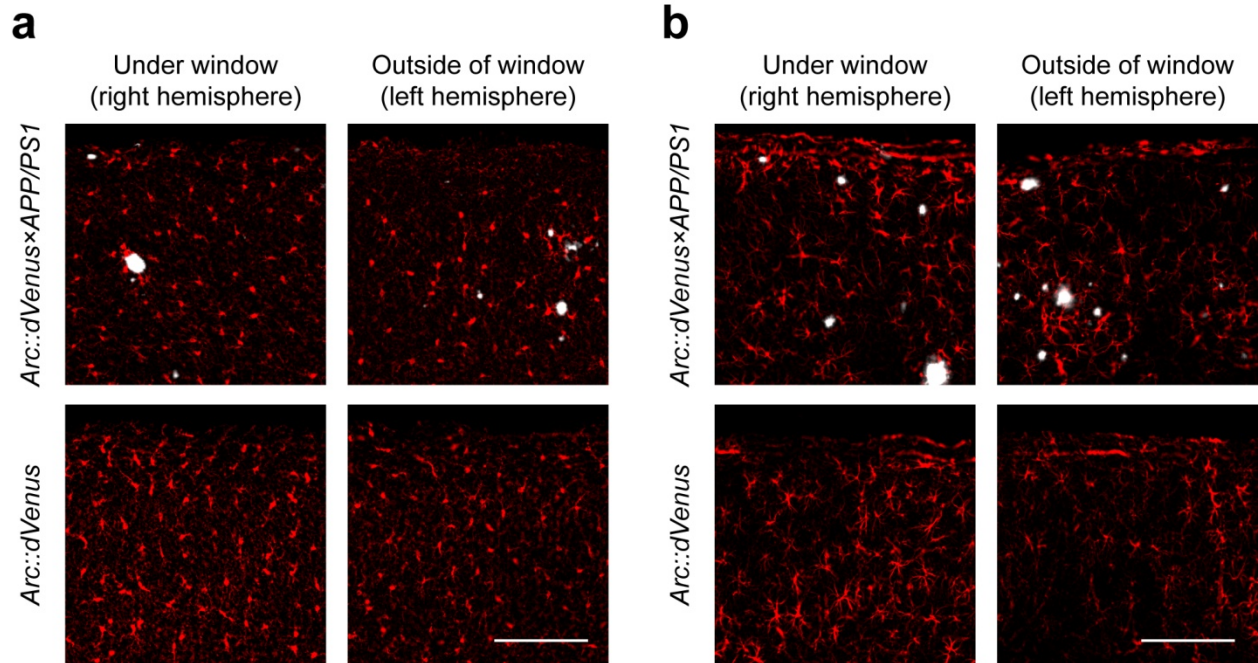

**Supplementary Figure 4.** Cranial window implantation causes no overt inflammatory response in the cortex of *Arc::dVenus* and *Arc::dVenus* $\times$ *APP/PS1* mice.

(**a–b**) Immunohistochemical staining for microglia marker Iba1 (**a**) and activated astrocytes marker GFAP (**b**) of medial extrastriate visual cortex (layer II/III) of *Arc::dVenus* $\times$ *APP/PS1* mouse and *Arc::dVenus* control littermate sacrificed 3 weeks after implantation of a cranial window. Left panels – right medial extrastriate visual area (covered by cranial window); right panels – left medial extrastriate visual area (contralateral to cranial window). Red – Iba1 (**a**) / GFAP (**b**) ; white – amyloid plaques stained with methoxy-X04. Scale bar = 300  $\mu$ m.

| Reference         | Species / model                | Brain region / cell type       | AD-related pathology                        | Arc induction                  | Arc ↑ or ↓ in AD-related pathology | Protein/RNA                       |
|-------------------|--------------------------------|--------------------------------|---------------------------------------------|--------------------------------|------------------------------------|-----------------------------------|
| <sup>45</sup>     | Ms brain                       | Hippocampus                    | Aged Tg2576                                 | Fear conditioning and baseline | n.c.                               | protein                           |
| <sup>33</sup>     | Hu brain ; ms neuronal culture | MFC; cortical primary cultures | Advanced AD; synthetic A $\beta$ dimers     | No                             | ↑                                  | protein                           |
| <sup>46</sup>     | Ms brain                       | Whole brain                    | Aged CRND8                                  | Basal and running wheel        | n.c.                               | protein                           |
| <sup>39</sup>     | Ms brain                       | Hippocampus                    | Aged rTg4510 (tangles)                      | Env. enrichment                | ↓                                  | RNA                               |
| <sup>31</sup>     | Ms brain                       | Hippocampus                    | Young (preplaque) Tg2576 and APP/Lo         | Basal, fear cond., Morris WM   | ↑                                  | protein                           |
| <sup>43</sup>     | Ms brain                       | Hippocampus and neocortex      | Young and aged APP/PS1, APPDutch, and APP23 | Env. enrichment                | ↓                                  | protein                           |
| <sup>29</sup>     | Ms brain                       | Hippocampus and cortex         | Young (preplaque) APP/PS1                   | No                             | ↑                                  | Reporter under Arc promoter (RNA) |
| <sup>35, 42</sup> | Rat neuronal culture           | Cortical primary cultures      | Synthetic A $\beta$                         | BDNF                           | ↓                                  | protein                           |
| <sup>34</sup>     | Ms brain                       | Hippocampus                    | 4-7 mo hAPP-J20                             | no                             | both ↑ and ↓                       | protein                           |
| <sup>38</sup>     | Ms neuronal culture            | Cortical primary cultures      | Synthetic A $\beta$                         | BDNF                           | ↓                                  | protein                           |
| <sup>44</sup>     | Ms brain                       | Hippocampus and cortex         | Young (preplaque) hAPP(low)                 | Env. enrichment                | n.c.                               | protein                           |
| <sup>41</sup>     | Ms brain                       | Hippocampus and cortex         | Young (preplaque) hAPP(FAD)                 | Basal and env. enrichment      | ↓ in DG, n.c. elsewhere            | protein, RNA                      |
| <sup>32</sup>     | Rat brain                      | Hippocampus                    | LPS infusion                                | Basal and env. enrichment      | ↑                                  | protein, RNA                      |
| <sup>30</sup>     | Rat neuronal culture           | Hippocampal primary cultures   | Synthetic A $\beta$                         | No                             | ↑                                  | protein                           |
| <sup>36, 37</sup> | Ms brain                       | Hippocampus                    | Aged APP/PS1                                | no                             | ↓                                  | RNA                               |
| <sup>40</sup>     | Hu brain                       | Hippocampus                    | Neurons with NFT                            | No                             | ↓                                  | RNA                               |

**Supplementary Table 1.** Summary of effects of AD-related pathologies on activity-induced or basal *Arc* expression reported in the literature.

Green entry – reported overall increase of *Arc* protein or RNA linked to AD; red – decrease; blue – no change or both directions. Ms, mouse; hu, human; DG, dentate gyrus of hippocampus; MFC, medial frontal cortex; NFT, neurofibrillary tangles; LPS, lipopolysaccharides.
